# Supplementary material for: Sensitized photochemistry of di(4-tetrazolouracil) dinucleoside monophosphate as a route to dicytosine cyclobutane photoproduct precursors
Source: Royal Society of Chemistry journal article supplement (doi:10.1039/c3pp25402j), 2013-04-09
Supplement: c3pp25402j.pdf [file c3pp25402j.pdf]

## Supporting Information

-----

### Sensitized photochemistry of di(4-tetrazolouracil) dinucleoside monophosphate as a route to dicytosine cyclobutane photoproduct precursors

Frédéric Peyrane and Pascale Clivio\*

#### Table of contents

##### NMR spectra and HPLC, HPLC/MS chromatograms:

|                                                                                                                                                      |            |
|------------------------------------------------------------------------------------------------------------------------------------------------------|------------|
| <b>Figure S2:</b> $^1\text{H}$ NMR spectrum of <b>2</b> (300 MHz, $\text{D}_2\text{O}$ ).                                                            | <b>S2</b>  |
| <b>Figure S3:</b> $^{13}\text{C}$ NMR spectrum of <b>2</b> (62.5 MHz, $\text{D}_2\text{O}$ ).                                                        | <b>S3</b>  |
| <b>Figure S4:</b> COSY spectrum of <b>2</b> (300 MHz, $\text{D}_2\text{O}$ ).                                                                        | <b>S4</b>  |
| <b>Figure S5:</b> HMQC spectrum of <b>2</b> (300 MHz, $\text{D}_2\text{O}$ ).                                                                        | <b>S5</b>  |
| <b>Figure S6:</b> HMBC spectrum of <b>2</b> (300 MHz, $\text{D}_2\text{O}$ ).                                                                        | <b>S6</b>  |
| <b>Figure S7:</b> $^1\text{H}$ NMR spectrum of the photosensitized irradiation of <b>2</b> (300 MHz, $\text{D}_2\text{O}$ ).                         | <b>S7</b>  |
| <b>Figure S8:</b> HPLC chromatogram of the photosensitized irradiation of <b>2</b> .                                                                 | <b>S8</b>  |
| <b>Figure S9:</b> $^1\text{H}$ NMR spectrum of <b>14a</b> (600 MHz, $\text{D}_2\text{O}$ ).                                                          | <b>S9</b>  |
| <b>Figure S10:</b> $^{13}\text{C}$ NMR spectrum of <b>14a</b> (62.5 MHz, $\text{D}_2\text{O}$ ).                                                     | <b>S10</b> |
| <b>Figure S11:</b> COSY spectrum of <b>14a</b> (400 MHz, $\text{D}_2\text{O}$ ).                                                                     | <b>S11</b> |
| <b>Figure S12:</b> HMQC spectrum of <b>14a</b> (400 MHz, $\text{D}_2\text{O}$ ).                                                                     | <b>S12</b> |
| <b>Figure S13:</b> HMBC spectrum of <b>14a</b> (400 MHz, $\text{D}_2\text{O}$ ).                                                                     | <b>S13</b> |
| <b>Figure S14:</b> NOESY spectrum of <b>14a</b> (400 MHz, $\text{D}_2\text{O}$ ).                                                                    | <b>S14</b> |
| <b>Figure S15:</b> $^1\text{H}$ NMR spectrum of <b>14b</b> (600 MHz, $\text{D}_2\text{O}$ ).                                                         | <b>S15</b> |
| <b>Figure S16:</b> $^{13}\text{C}$ NMR spectrum of <b>14b</b> (75 MHz, $\text{D}_2\text{O}$ ).                                                       | <b>S16</b> |
| <b>Figure S17:</b> COSY spectrum of <b>14b</b> (400 MHz, $\text{D}_2\text{O}$ ).                                                                     | <b>S17</b> |
| <b>Figure S18:</b> HMQC spectrum of <b>14b</b> (300 MHz, $\text{D}_2\text{O}$ ).                                                                     | <b>S18</b> |
| <b>Figure S19:</b> HMBC spectrum of <b>14b</b> (400 MHz, $\text{D}_2\text{O}$ ).                                                                     | <b>S19</b> |
| <b>Figure S20:</b> NOESY spectrum of <b>14b</b> (400 MHz, $\text{D}_2\text{O}$ ).                                                                    | <b>S20</b> |
| <b>Figure S21:</b> $^1\text{H}$ NMR spectrum of <b>14c</b> (300 MHz, $\text{D}_2\text{O}$ ).                                                         | <b>S21</b> |
| <b>Figure S22:</b> HPLC chromatogram and HPLC/MS total ion current chromatogram of <b>14a</b> .                                                      | <b>S22</b> |
| <b>Figure S23:</b> HPLC chromatogram and HPLC/MS total ion current chromatogram of the $\text{K}_2\text{CO}_3/\text{MeOH}$ treatment of <b>14a</b> . | <b>S23</b> |

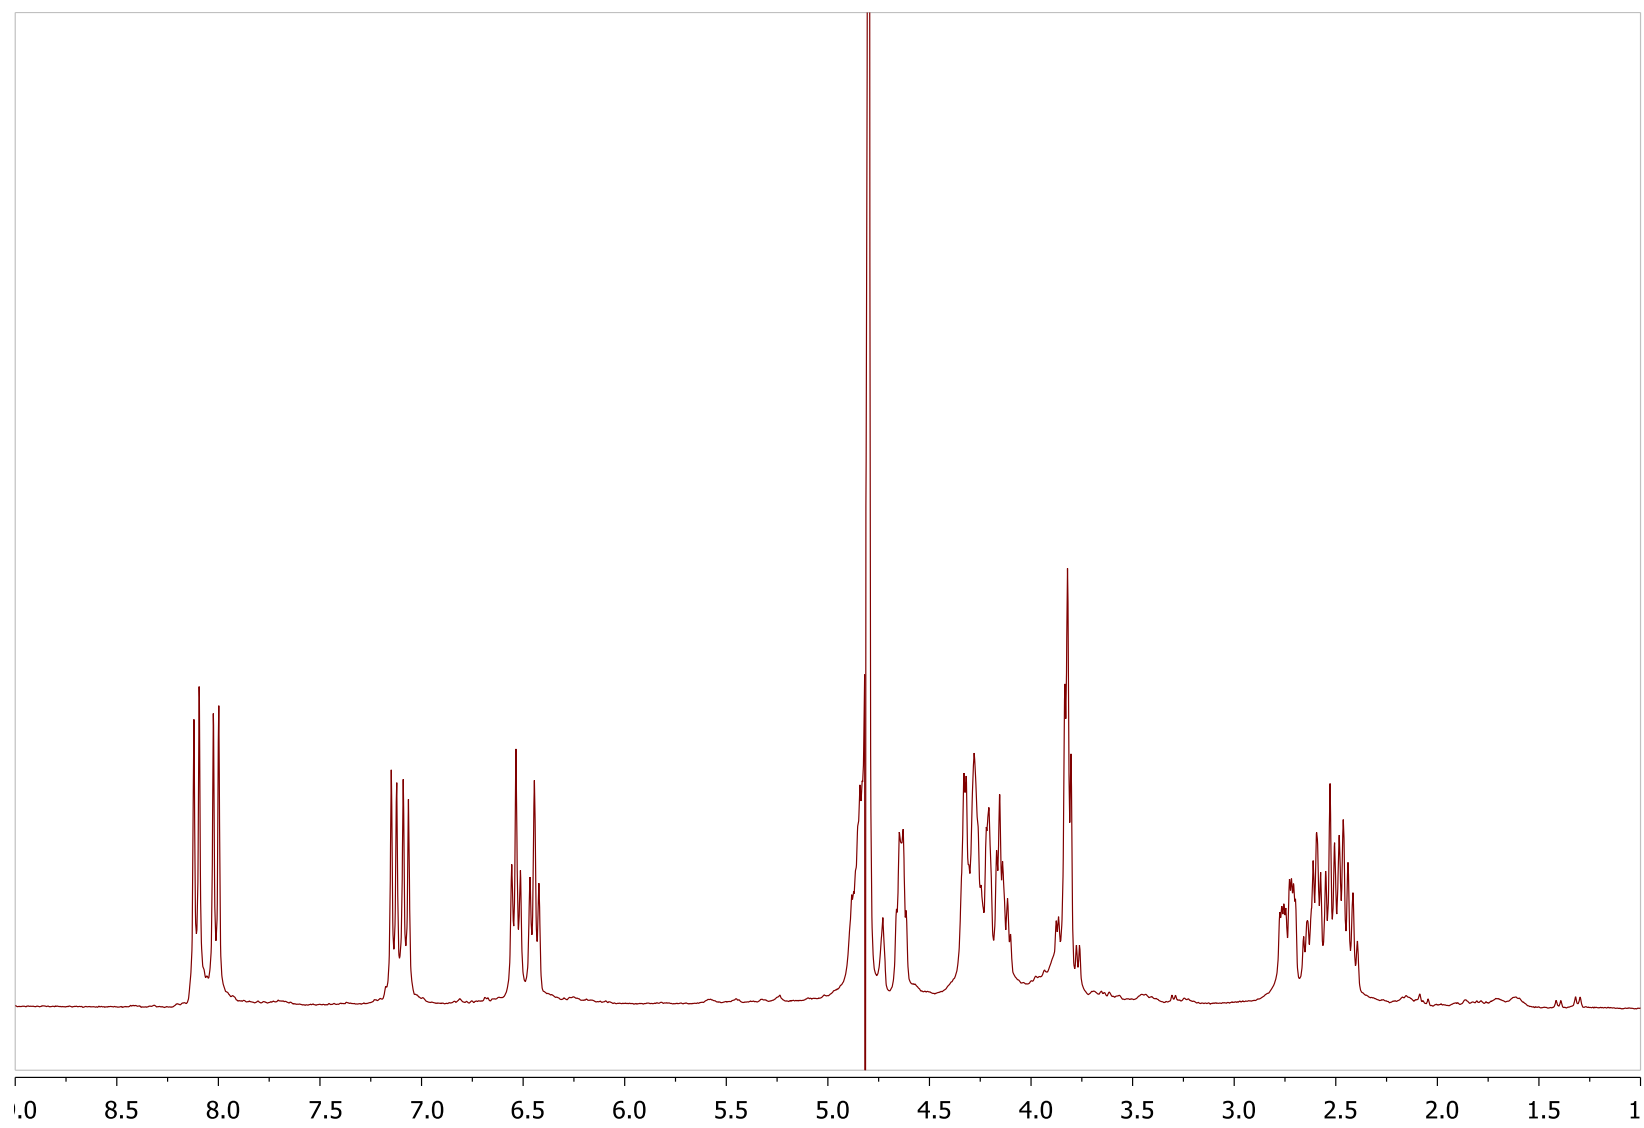

**Figure S2:**  $^1\text{H}$  NMR spectrum of **2** (300 MHz,  $\text{D}_2\text{O}$ ).

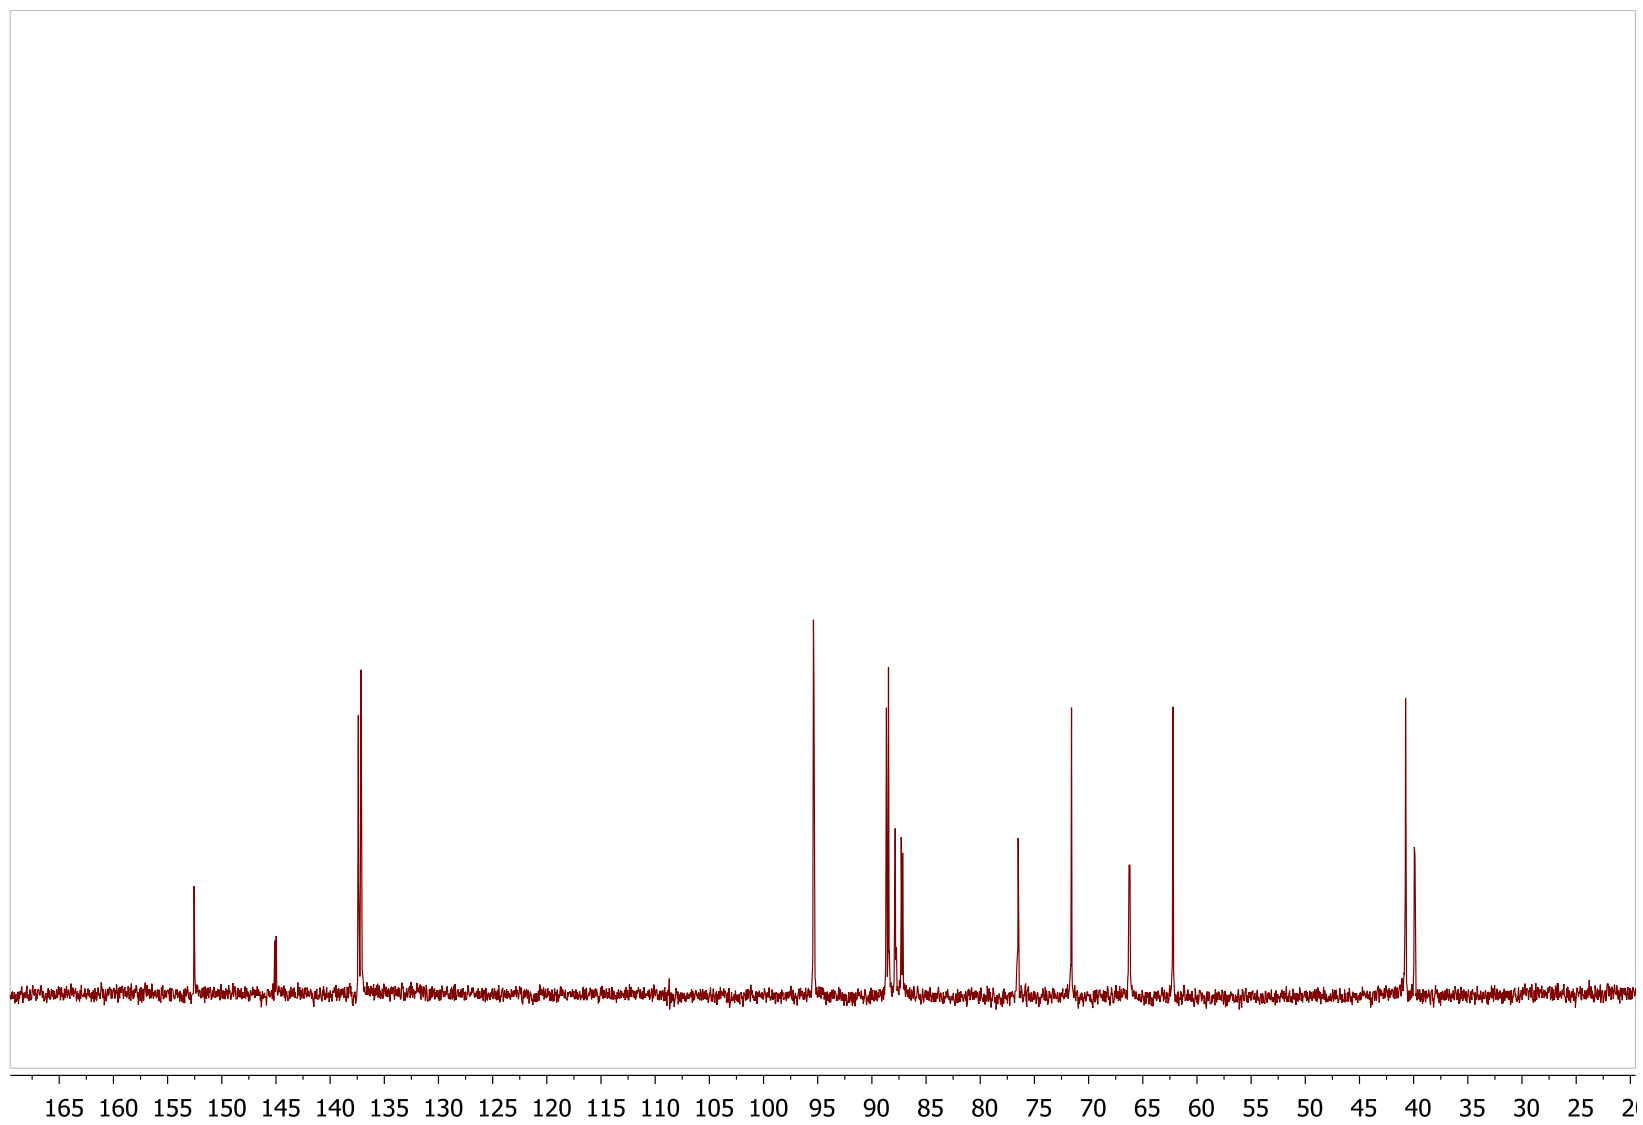

**Figure S3:**  $^{13}\text{C}$  NMR spectrum of **2** (62.5 MHz,  $\text{D}_2\text{O}$ ).

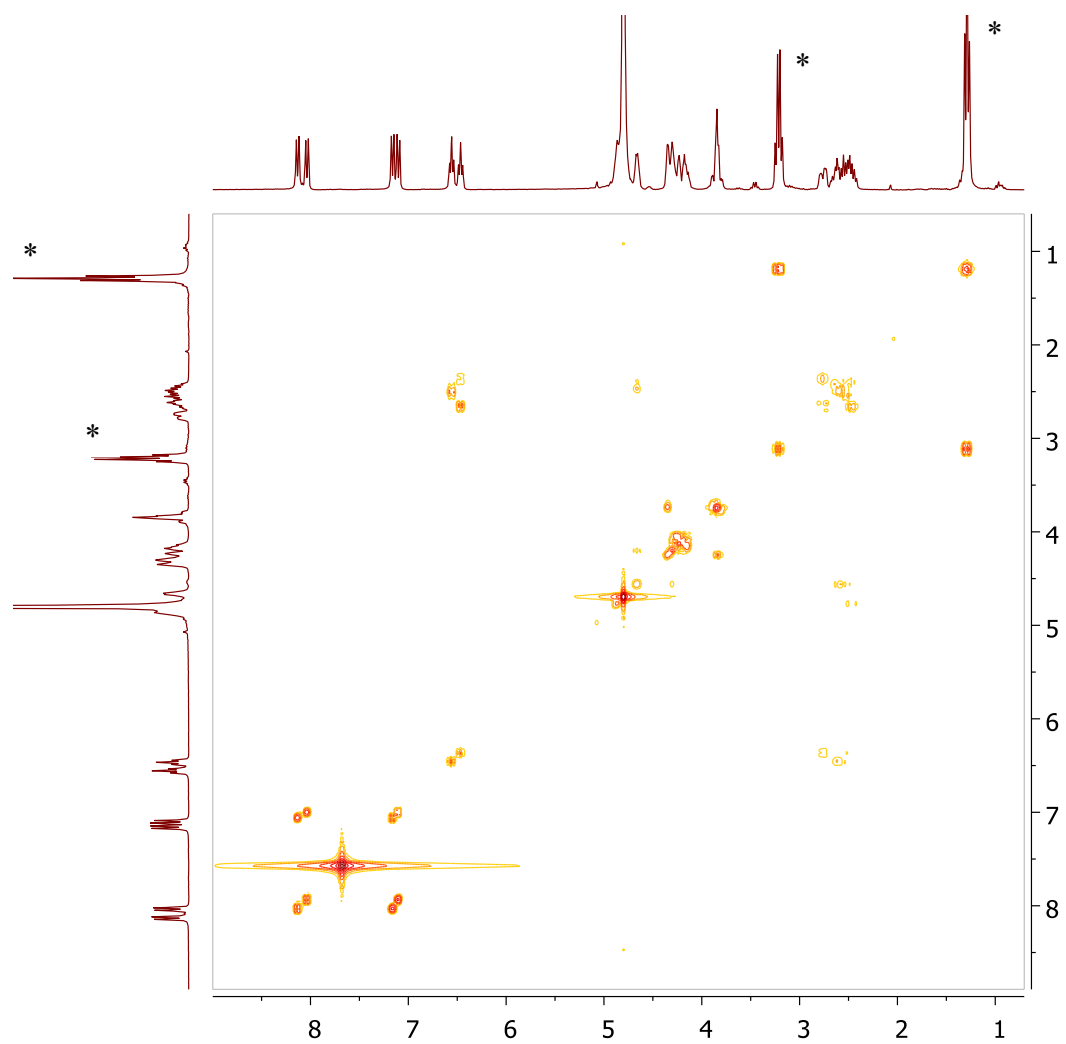

**Figure S4:** COSY spectrum of **2** (300 MHz, D<sub>2</sub>O). \*: Contaminated with Et<sub>3</sub>N

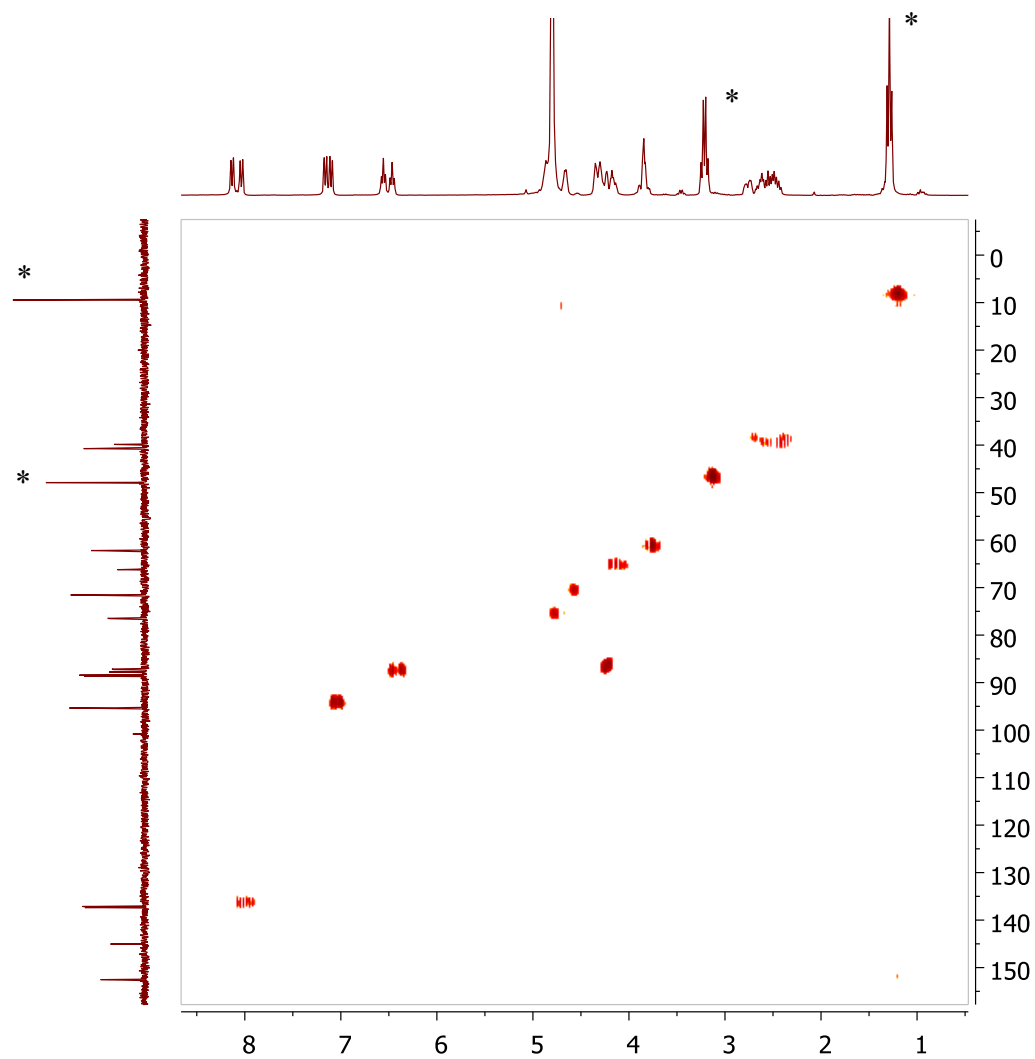

**Figure S5:** HMPC spectrum of **2** (300 MHz,  $\text{D}_2\text{O}$ ). \*: Contaminated with  $\text{Et}_3\text{N}$

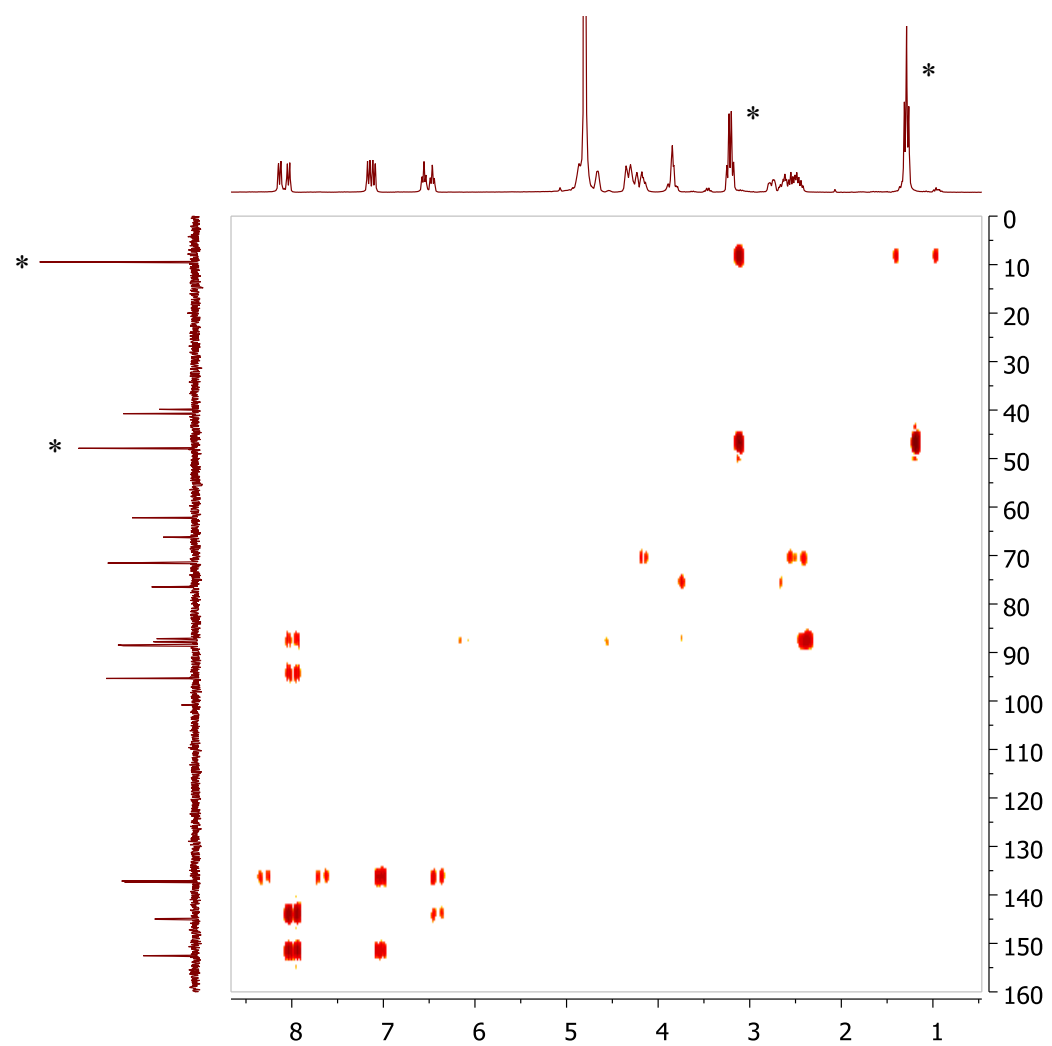

**Figure S6:** HMBC spectrum of **2** (300 MHz, D<sub>2</sub>O). \*: Contaminated with Et<sub>3</sub>N

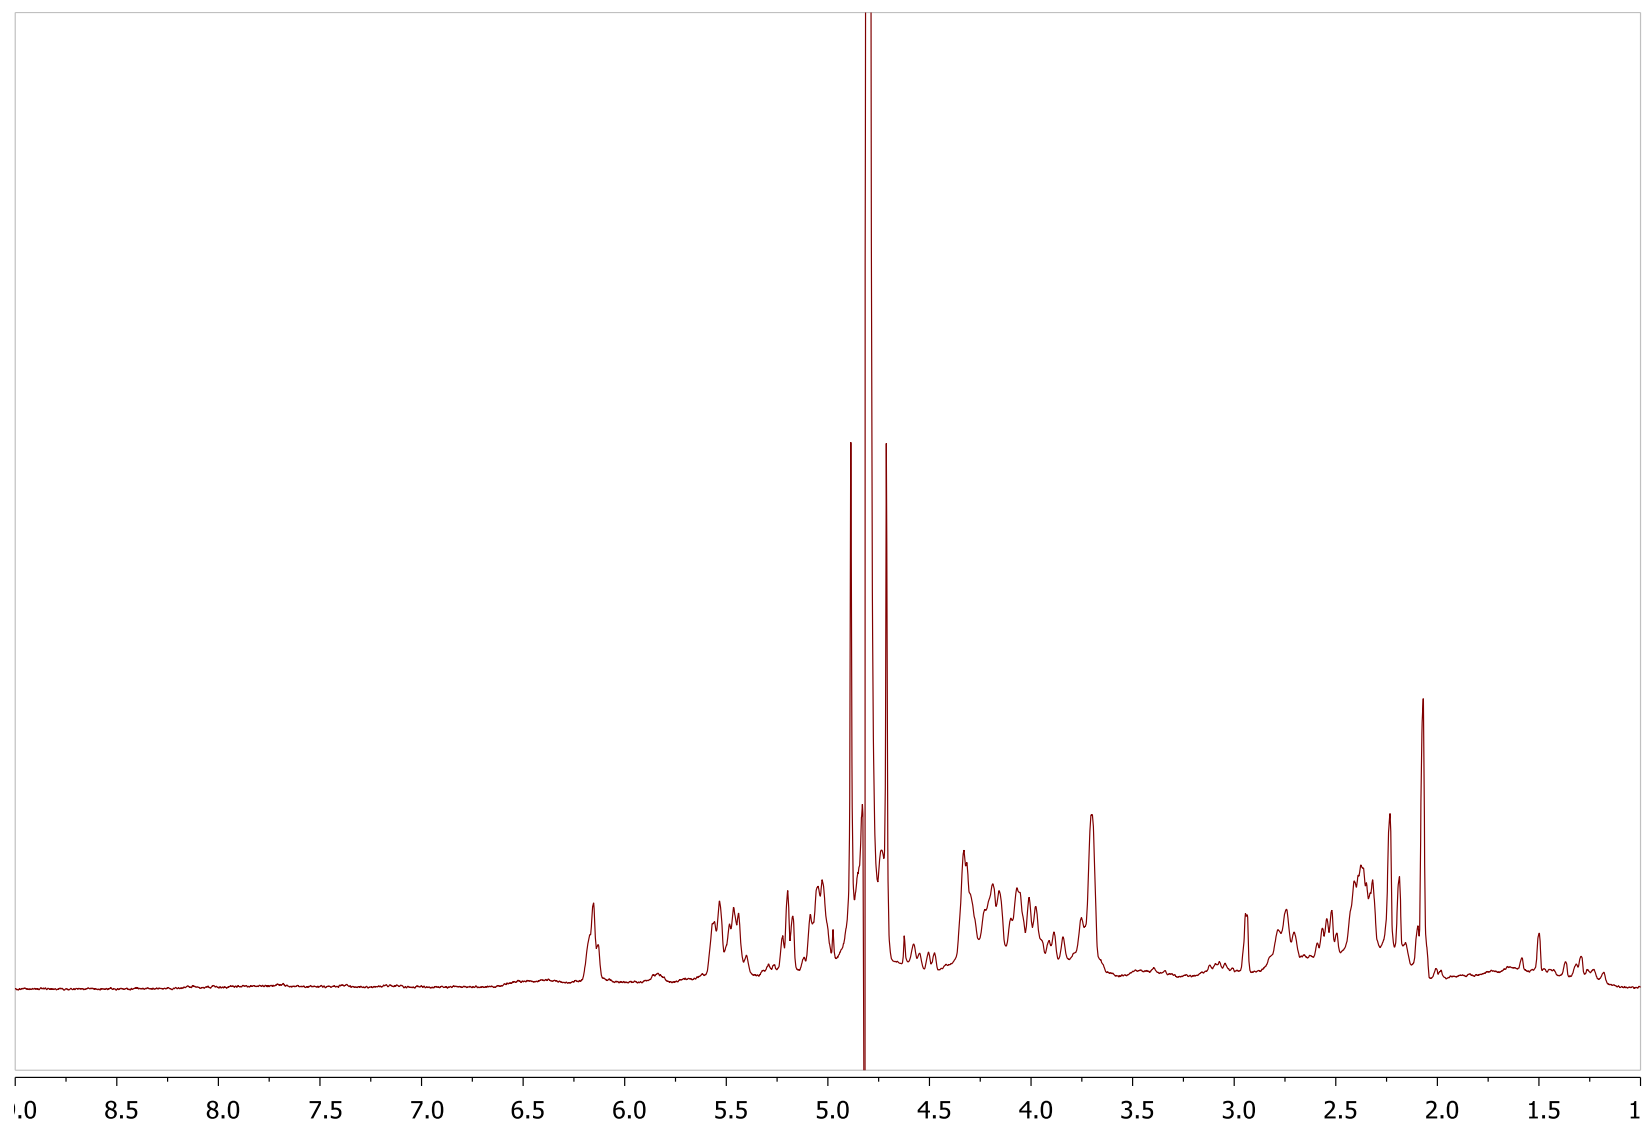

**Figure S7:**  $^1\text{H}$  NMR spectrum of the photosensitized irradiation of **2** (300 MHz,  $\text{D}_2\text{O}$ ).

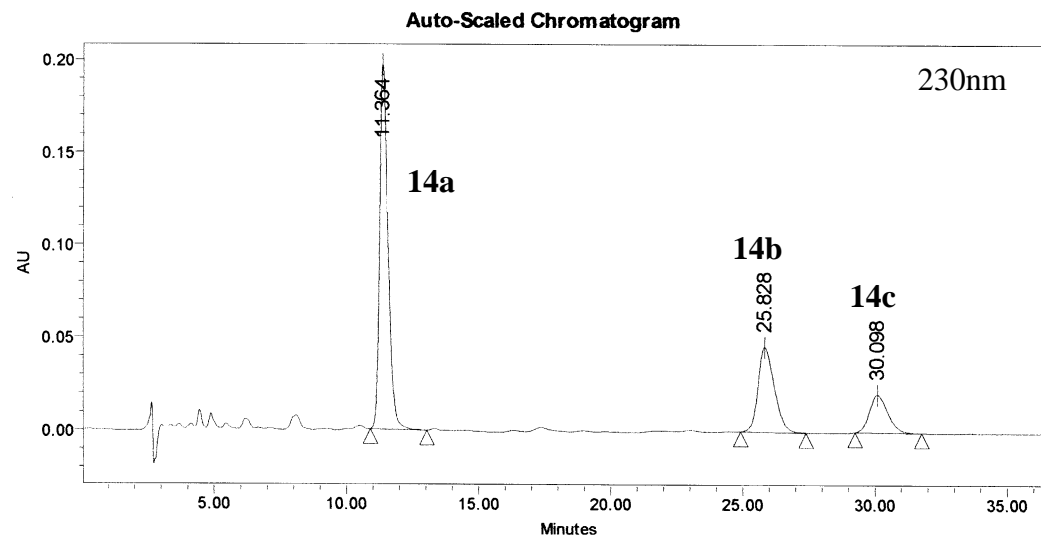

**Processed Channel: PDA 230.0 nm**

|   | Processed Channel | Retention Time (min) | Area    | % Area | Height |
|---|-------------------|----------------------|---------|--------|--------|
| 1 | PDA 230.0 nm      | 11.364               | 4355764 | 59.74  | 197047 |
| 2 | PDA 230.0 nm      | 25.828               | 1949602 | 26.74  | 45729  |
| 3 | PDA 230.0 nm      | 30.098               | 985411  | 13.52  | 20260  |

**Figure S8:** HPLC chromatogram of the photosensitized irradiation of **2**.  
(SYMMETRY C18 (5 $\mu$ m, 250x4.6 mm) column eluted with ammonium acetate 0.05 M at a flow rate of 1 mL/min)



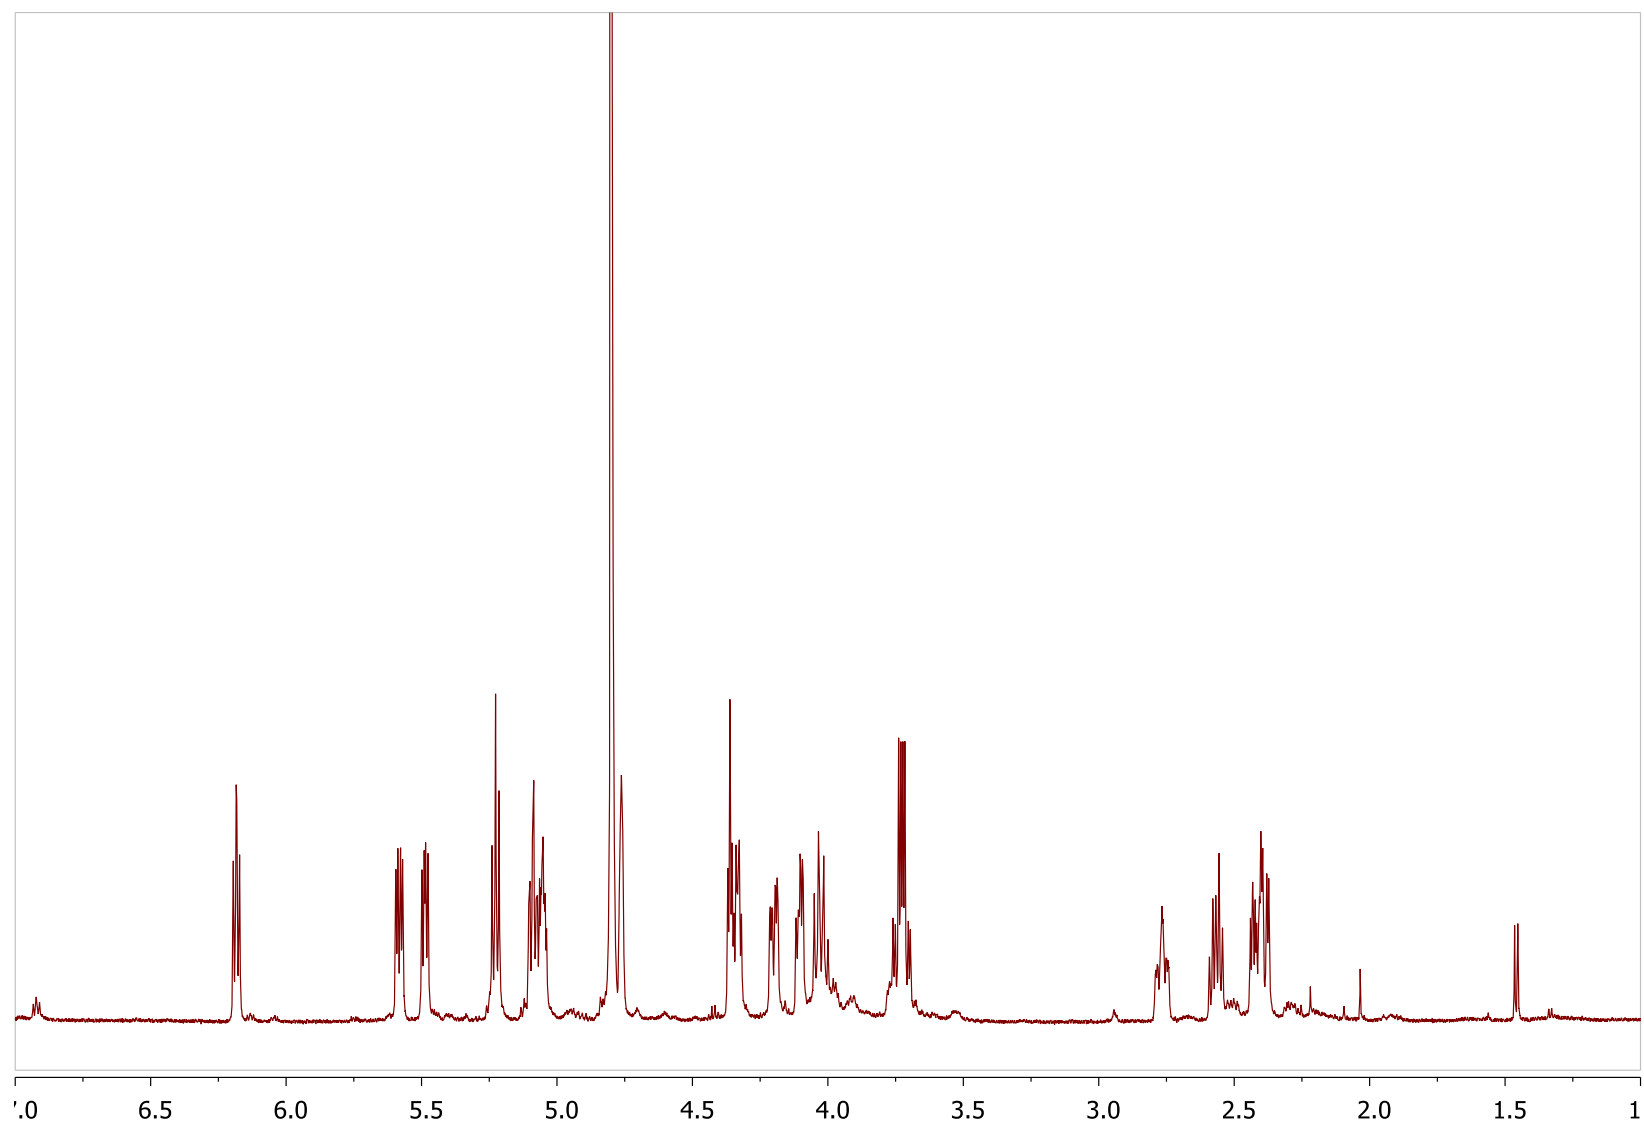

**Figure S9:**  $^1\text{H}$  NMR spectrum of **14a** (600 MHz,  $\text{D}_2\text{O}$ ).

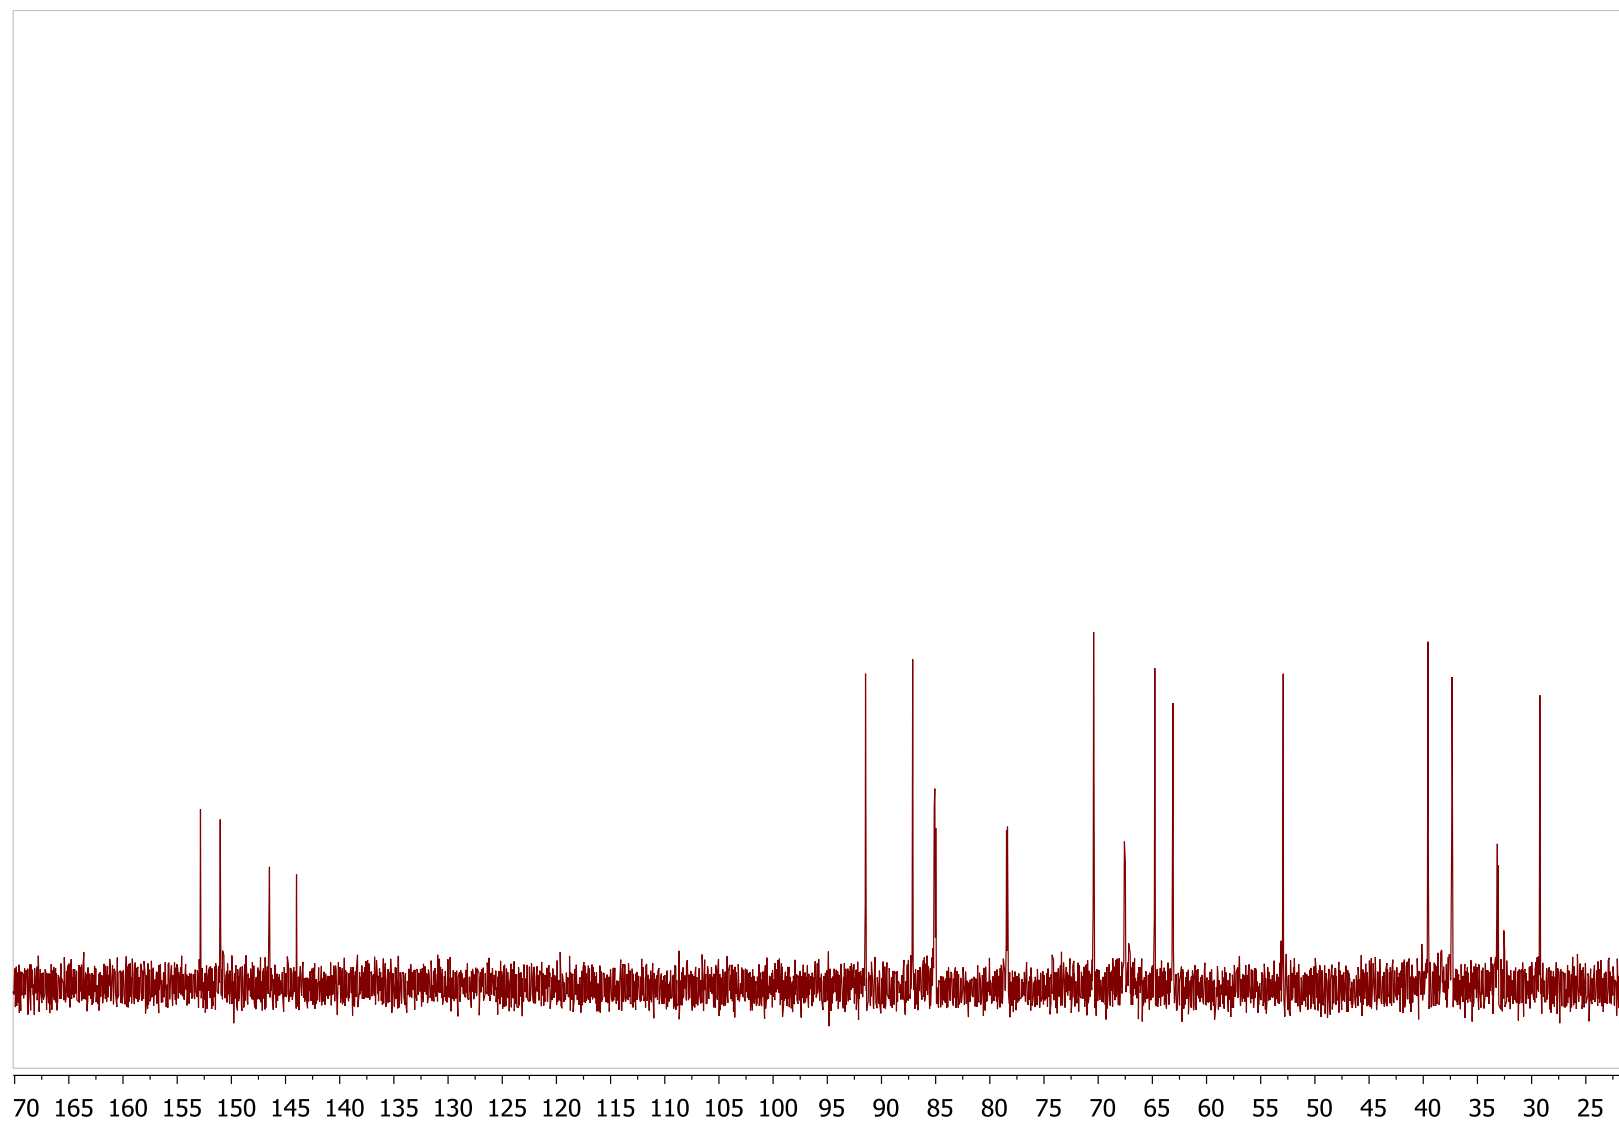

**Figure S10:**  $^{13}\text{C}$  NMR spectrum of **14a** (62.5 MHz,  $\text{D}_2\text{O}$ ).

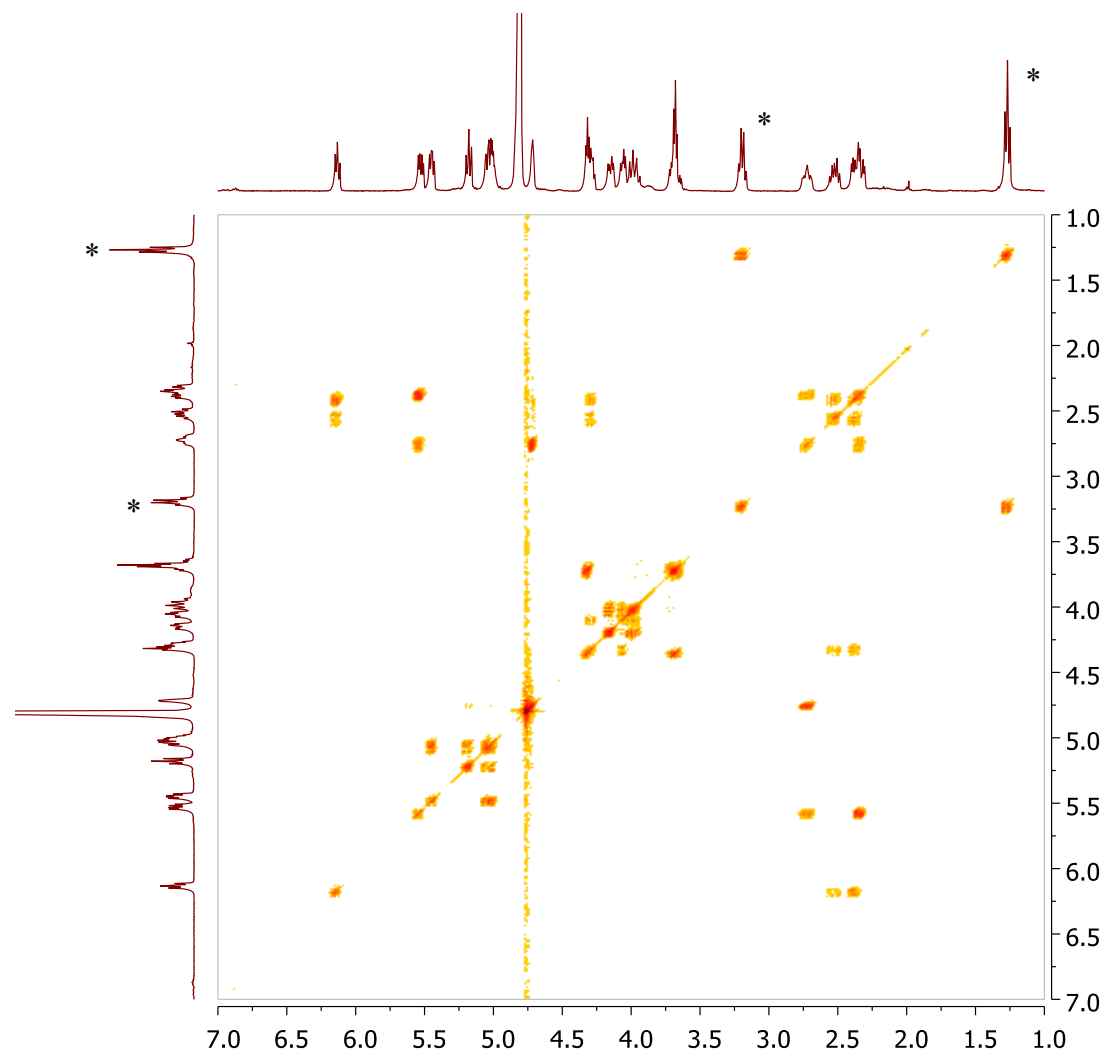

**Figure S11:** COSY spectrum of **14a** (400 MHz, D<sub>2</sub>O). \*: Contaminated with Et<sub>3</sub>N

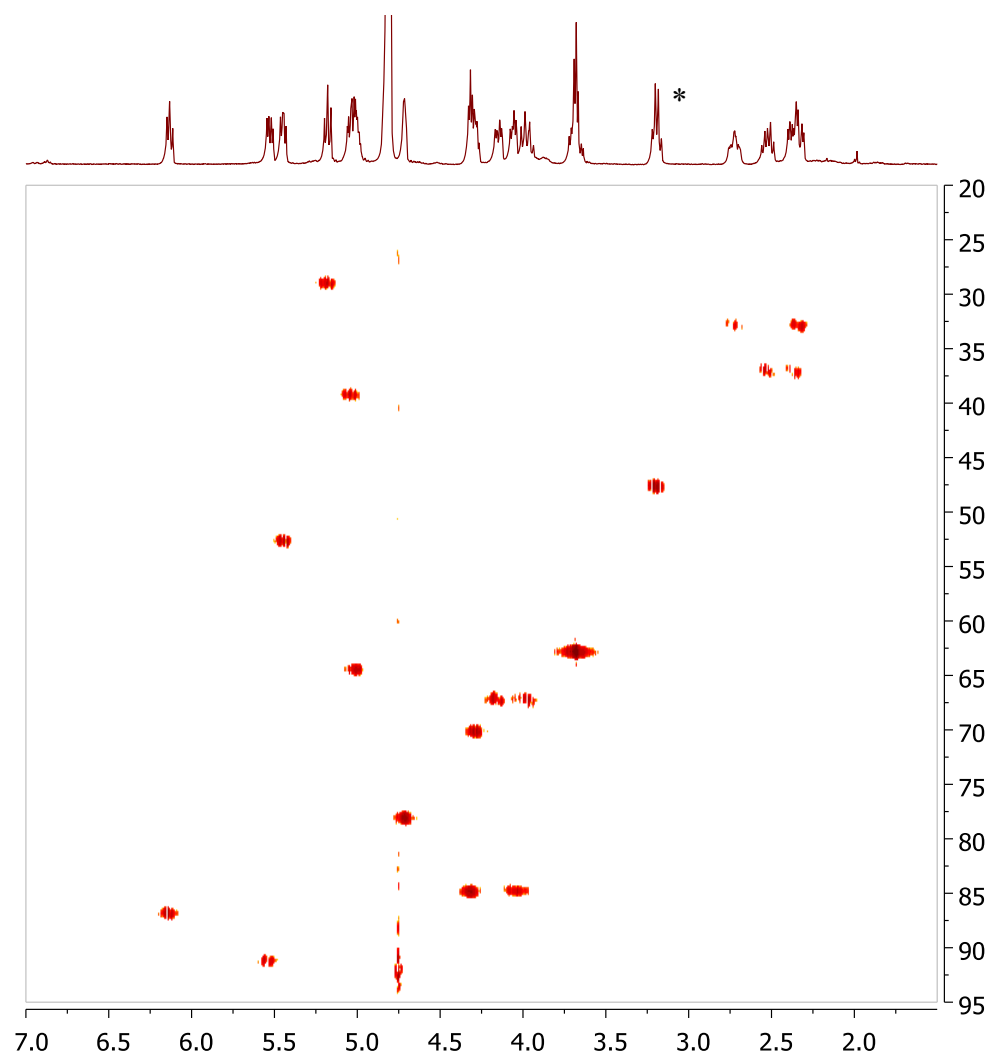

**Figure S12:** HMOC spectrum of **14a** (400 MHz,  $\text{D}_2\text{O}$ ). \*: Contaminated with  $\text{Et}_3\text{N}$

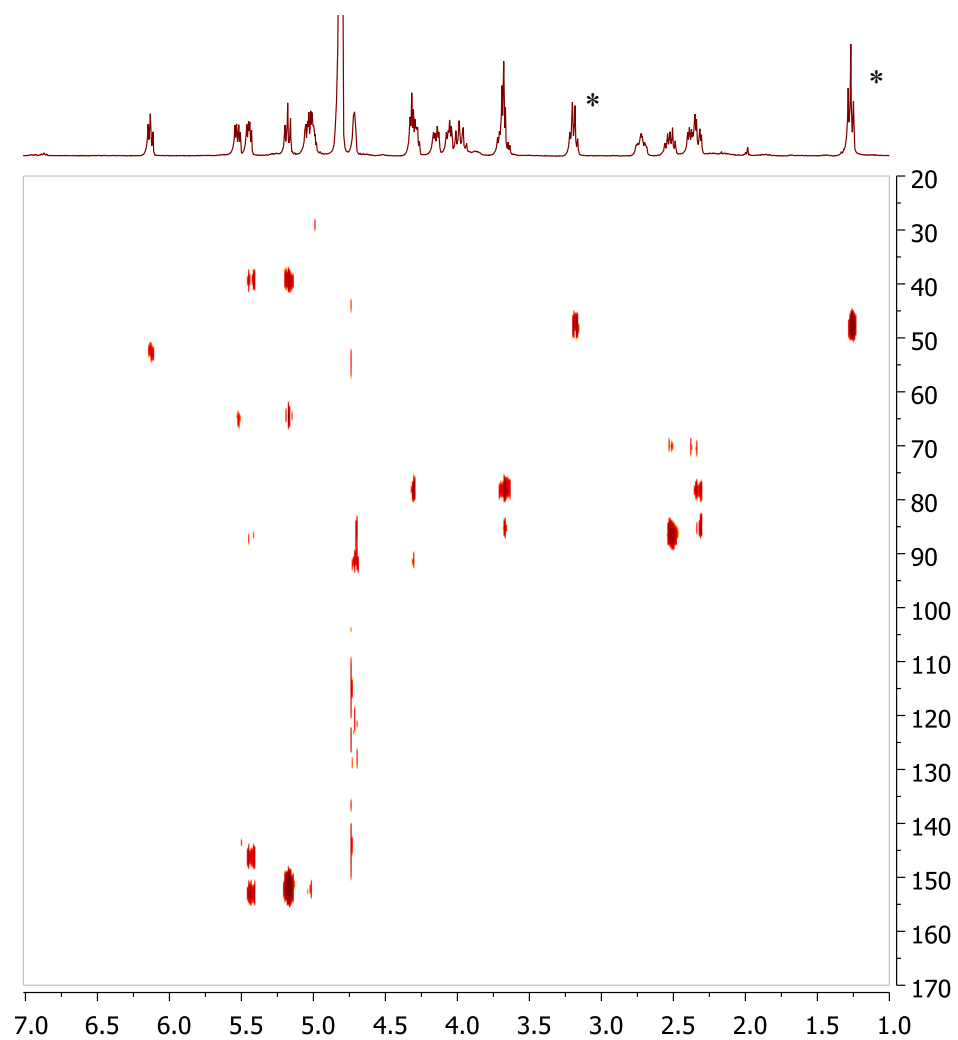

**Figure S13:** HMBC spectrum of **14a** (400 MHz, D<sub>2</sub>O). \*: Contaminated with Et<sub>3</sub>N

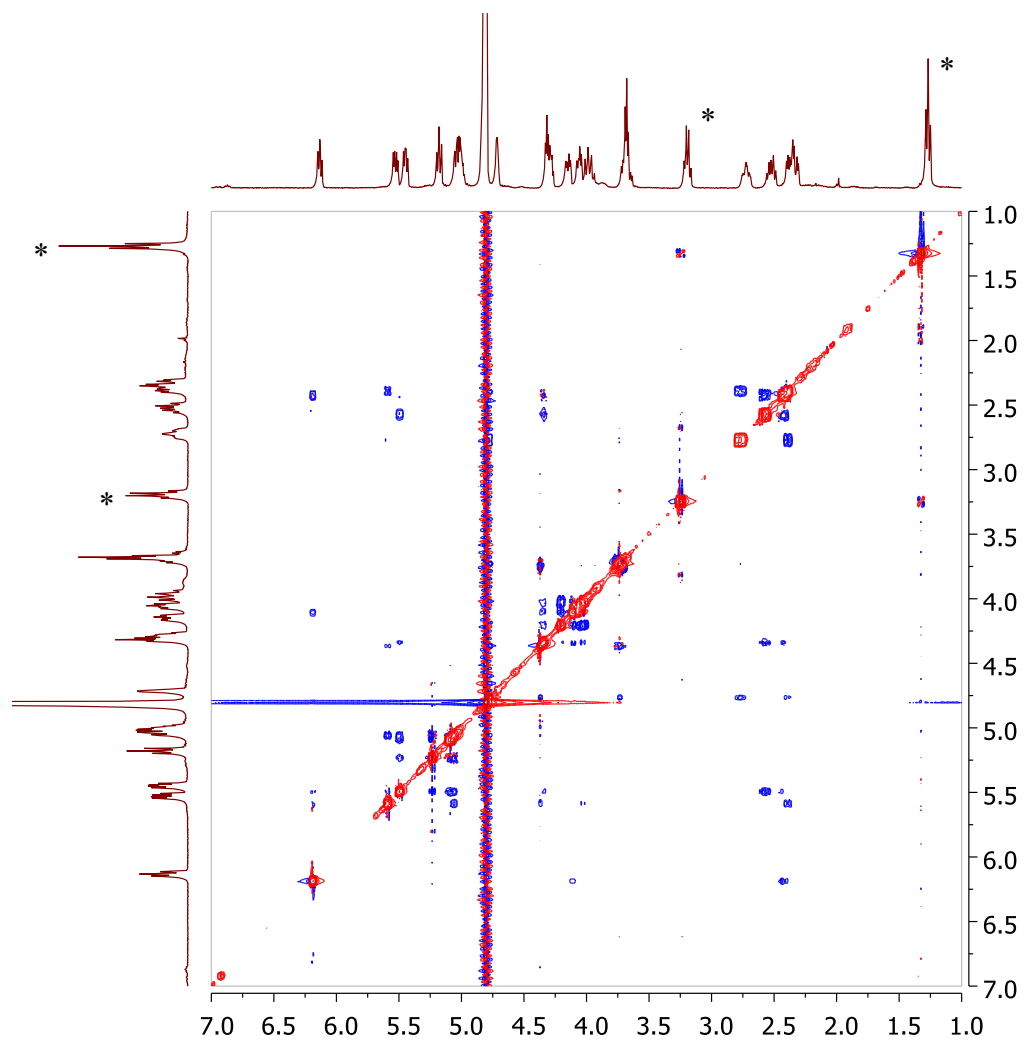

**Figure S14:** NOESY spectrum of **14a** (400 MHz, D<sub>2</sub>O, mixing time 600 ms). \*: Contaminated with Et<sub>3</sub>N

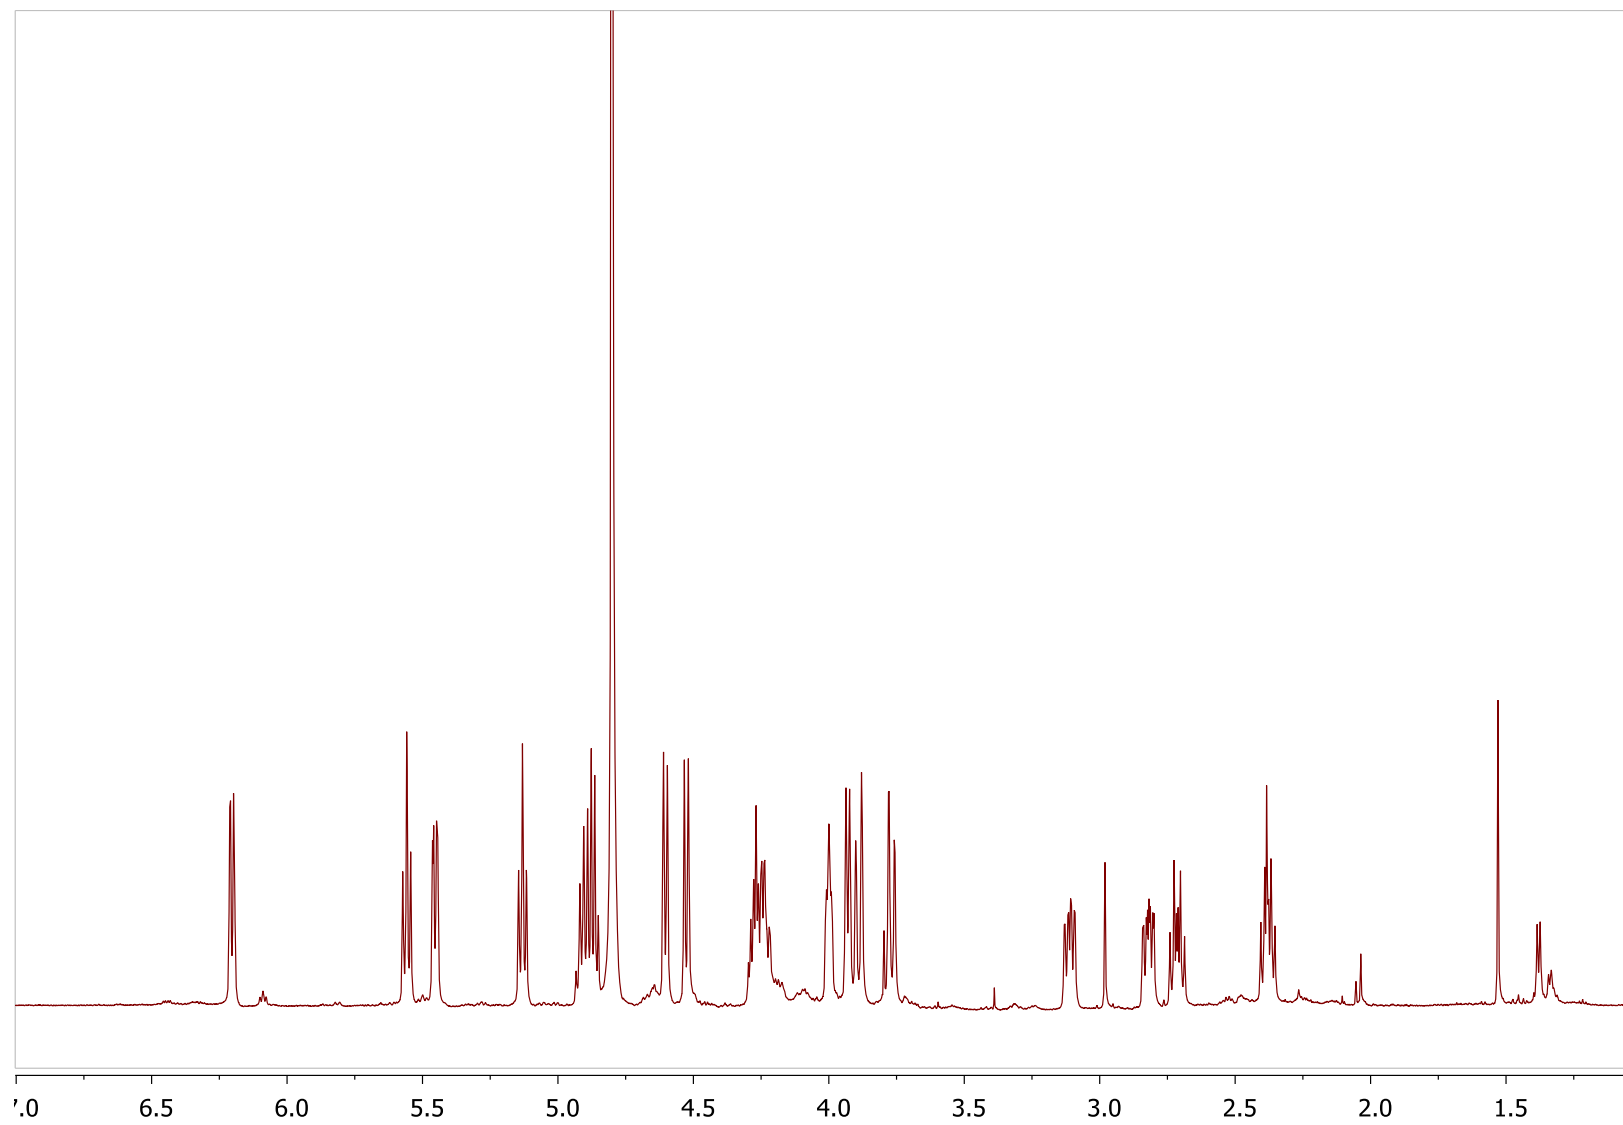

**Figure S15:**  $^1\text{H}$  NMR spectrum of **14b** (600 MHz,  $\text{D}_2\text{O}$ ).

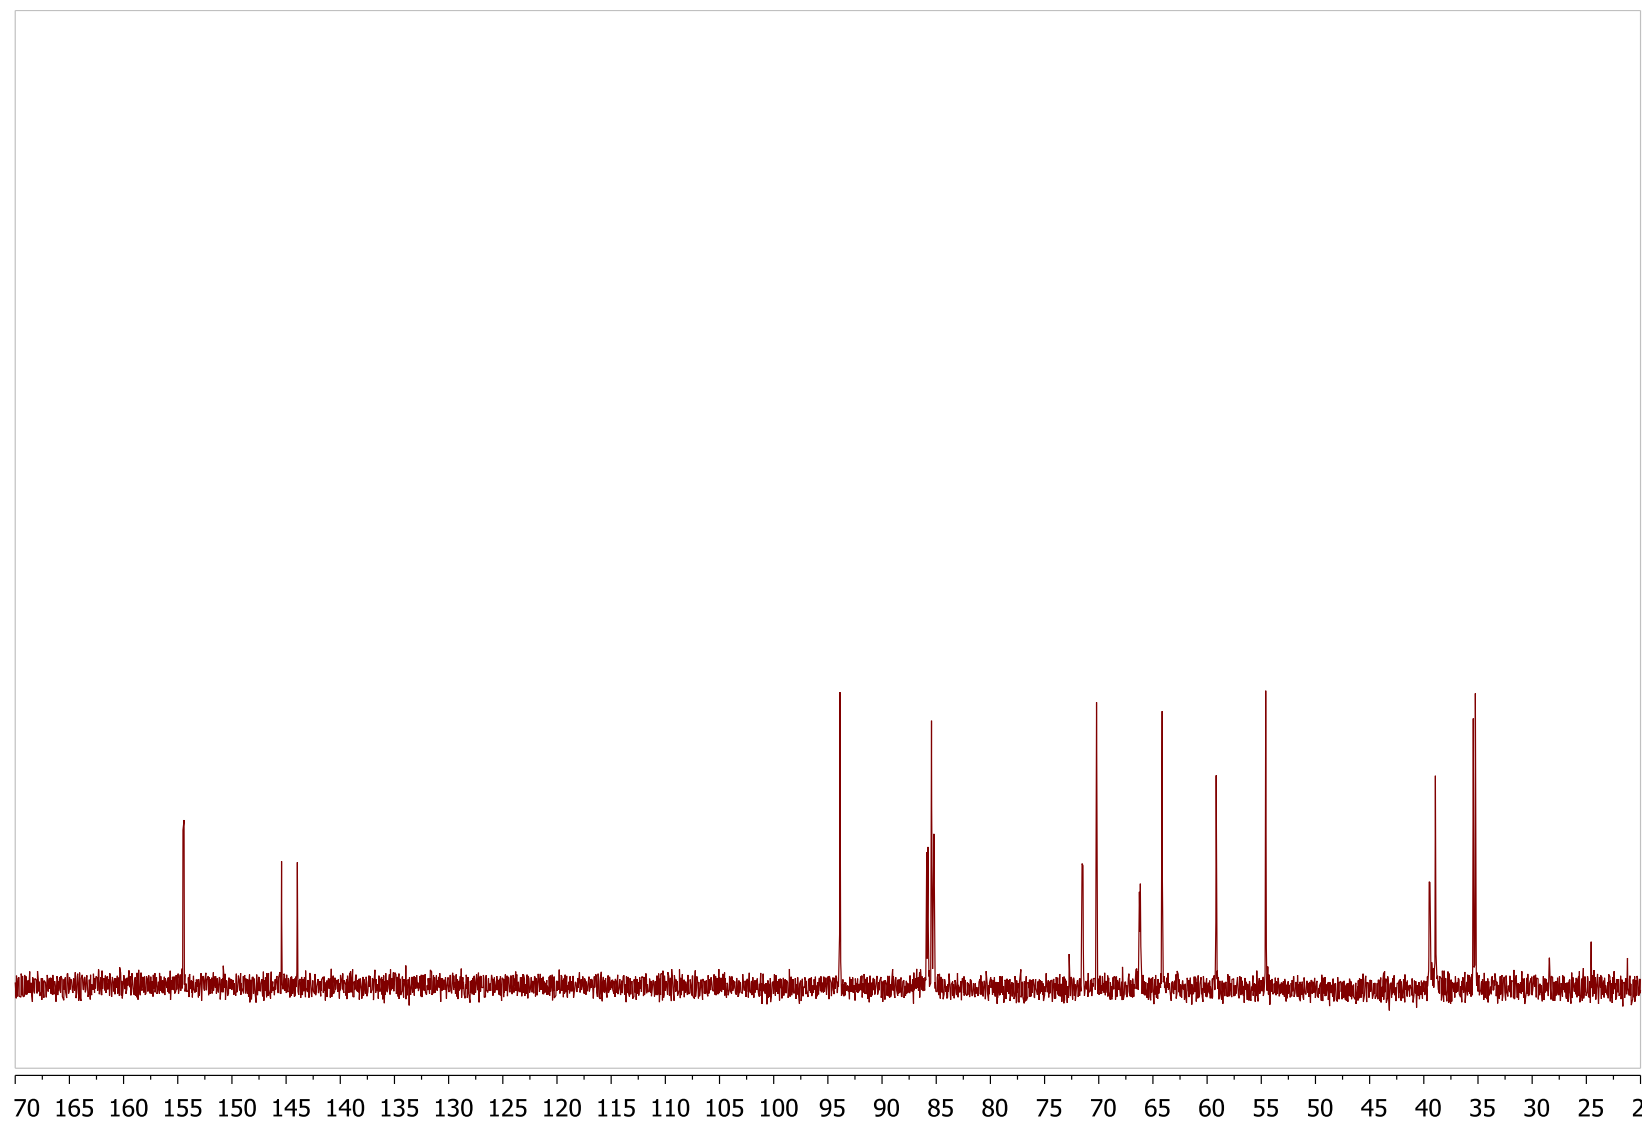

**Figure S16:**  $^{13}\text{C}$  NMR spectrum of **14b** (75 MHz,  $\text{D}_2\text{O}$ ).



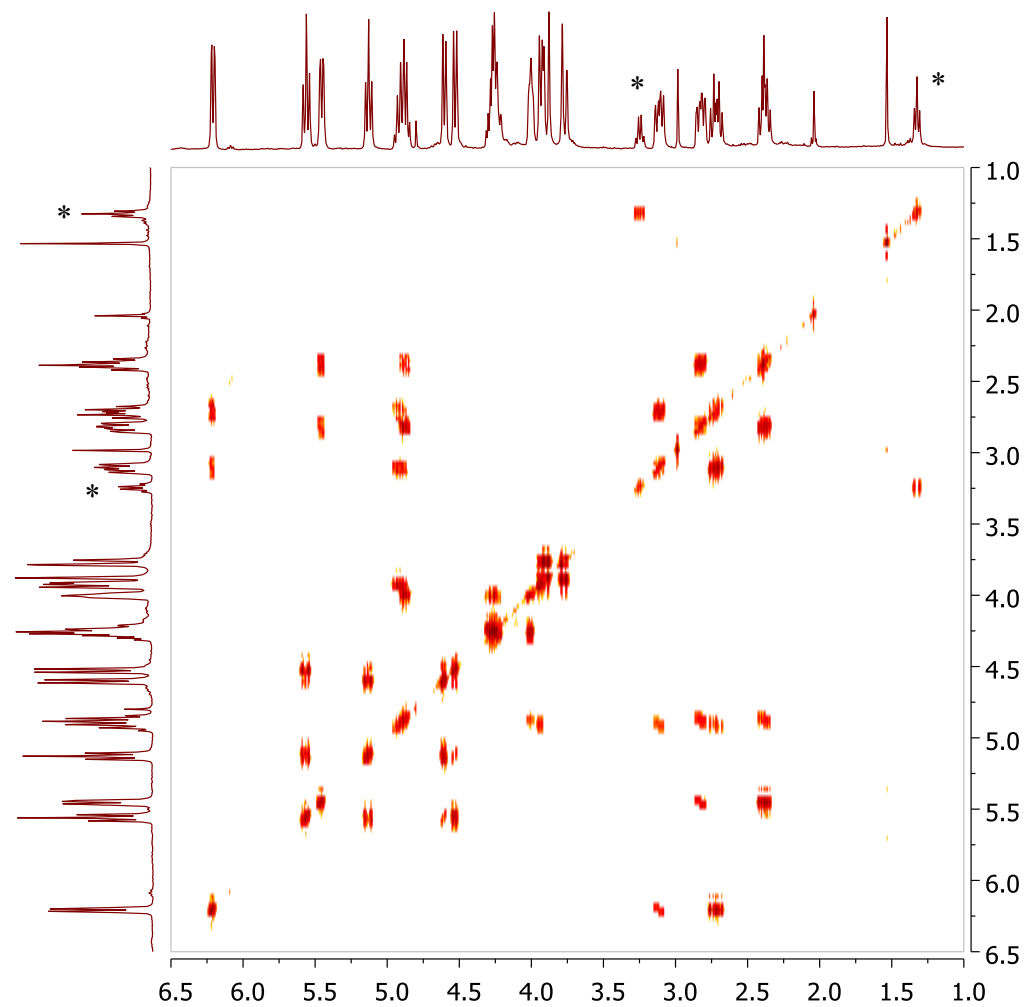

**Figure S17:** COSY spectrum of **14b** (400 MHz, D<sub>2</sub>O). \*: Contaminated with Et<sub>3</sub>N

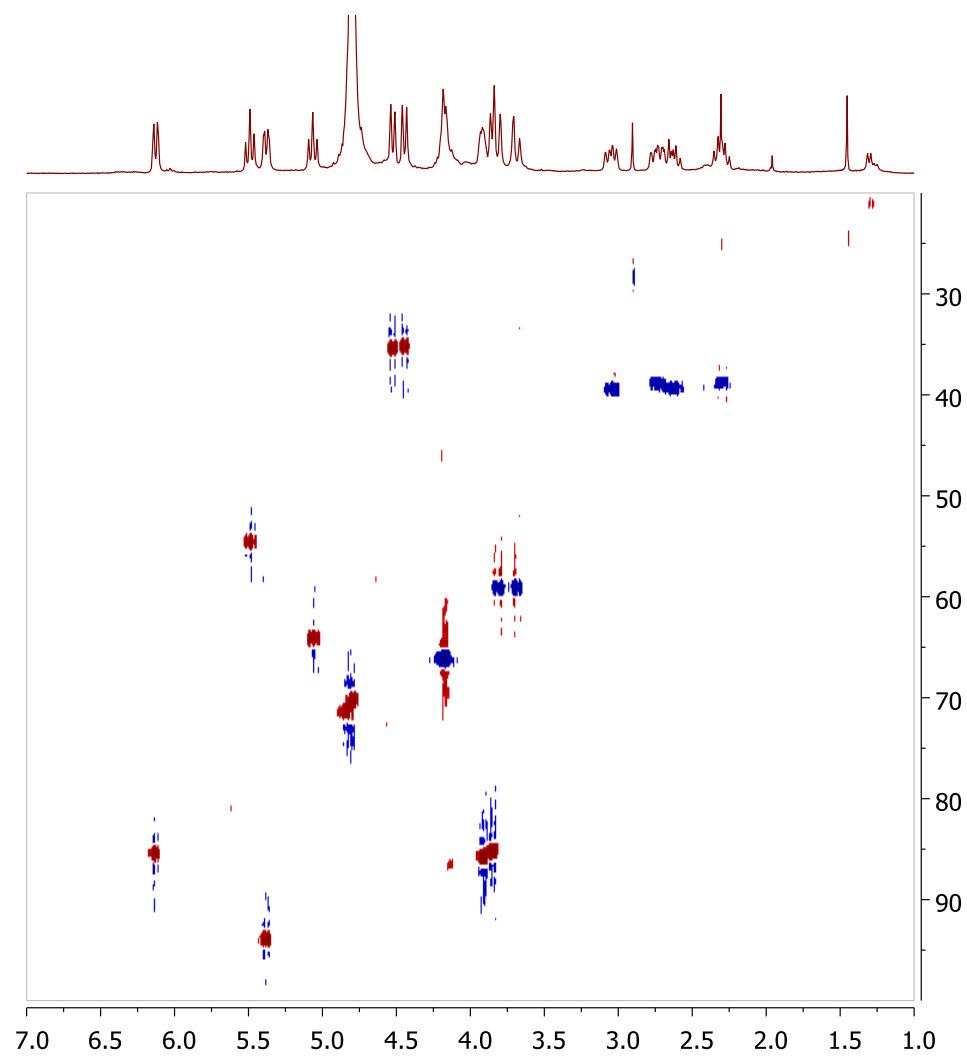

**Figure S18:** HMQC spectrum of **14b** (300 MHz,  $\text{D}_2\text{O}$ ).

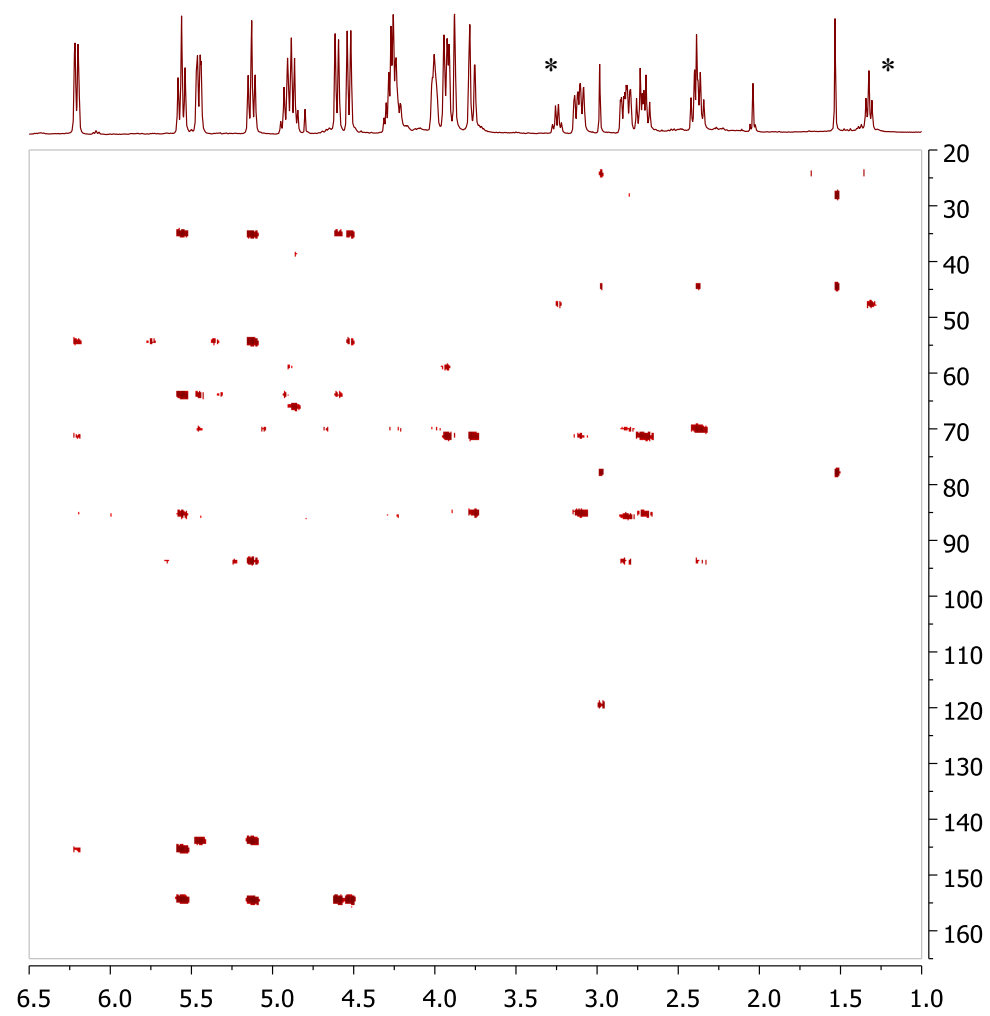

**Figure S19:** HMBC spectrum of **14b** (400 MHz,  $D_2O$ ). \*: Contaminated with  $Et_3N$

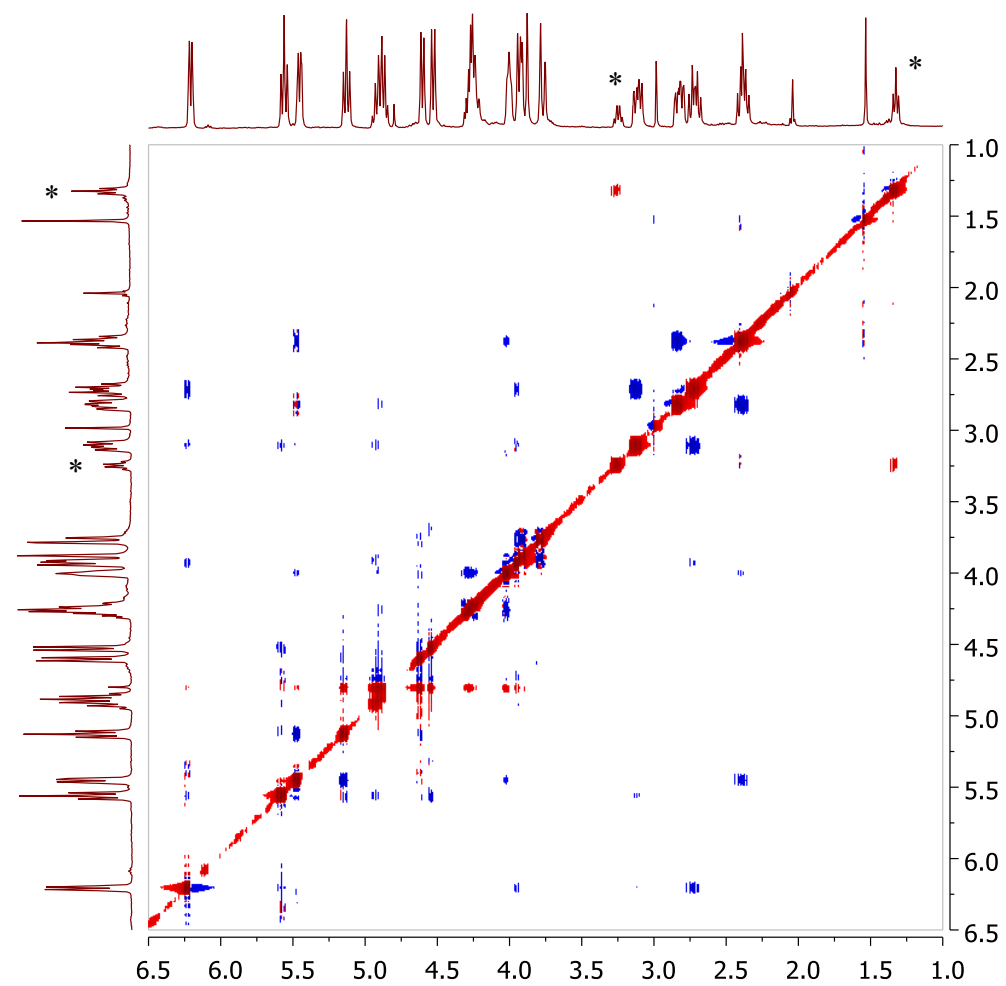

**Figure S20:** NOESY spectrum of **14b** (400 MHz, D<sub>2</sub>O, mixing time 600 ms). \*: Contaminated with Et<sub>3</sub>N

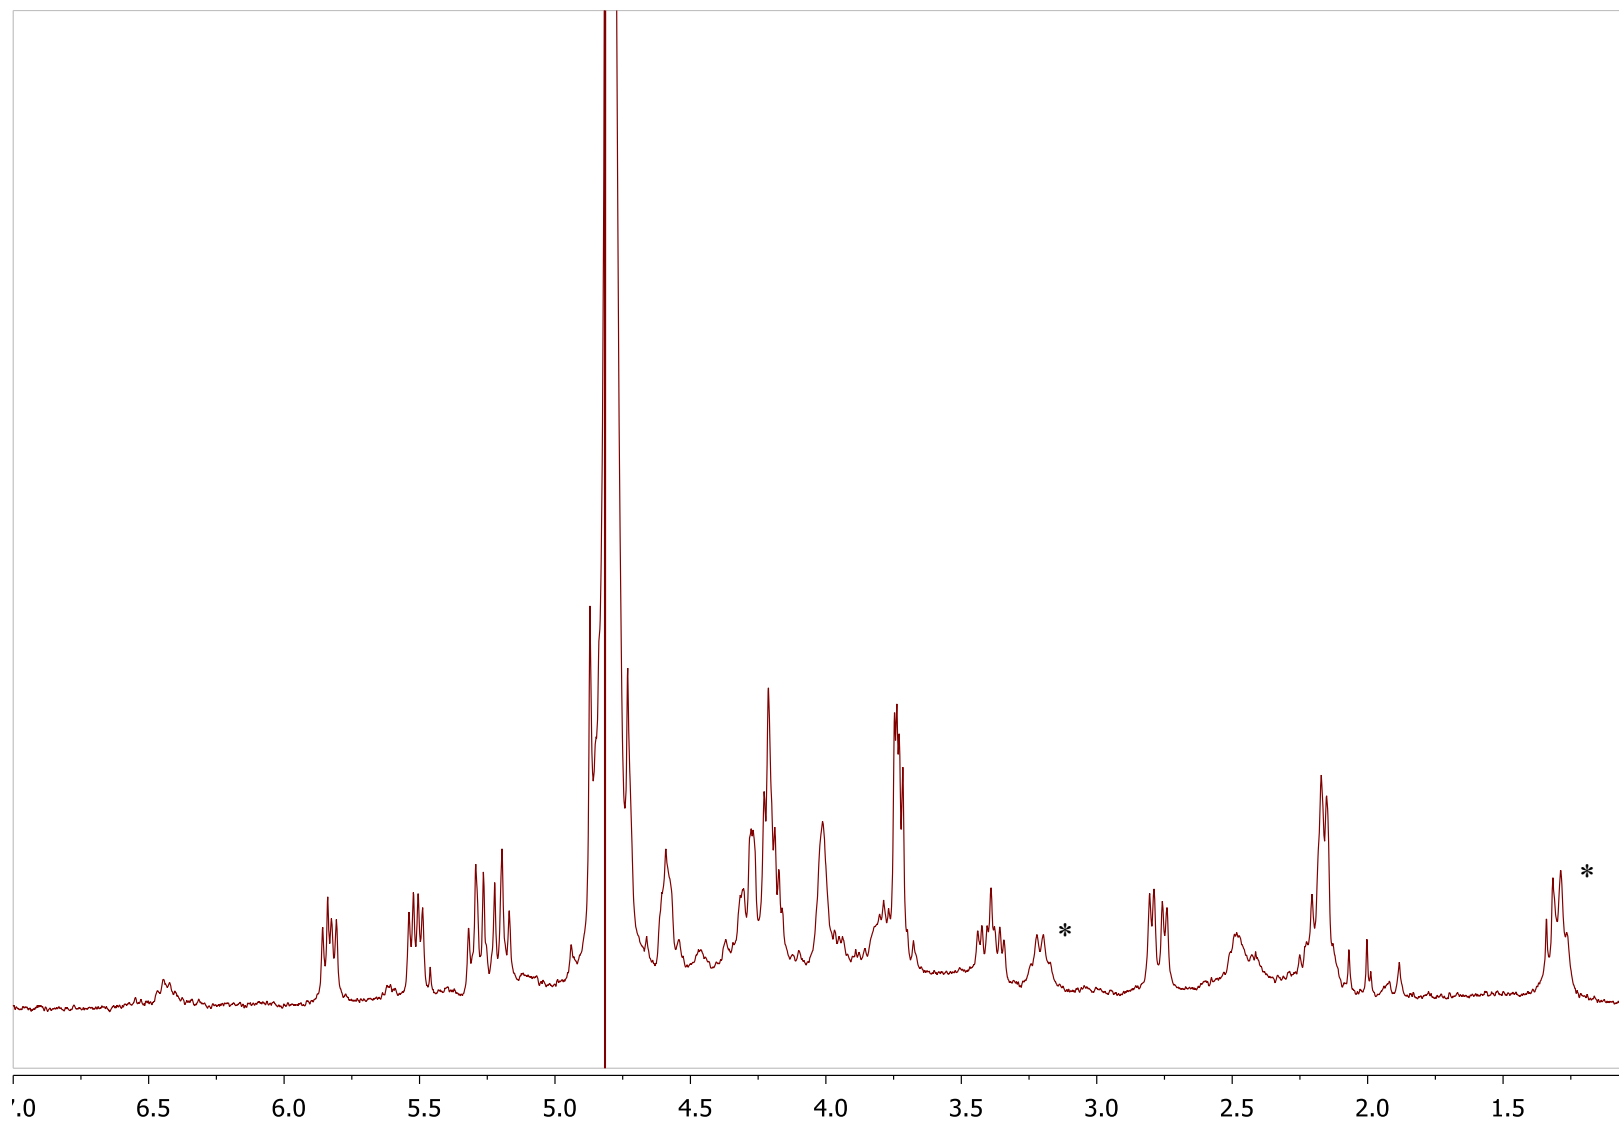

**Figure S21:** <sup>1</sup>H NMR spectrum of **14c** (300 MHz, D<sub>2</sub>O). \*: Contaminated with Et<sub>3</sub>N

## LC-MS analysis of the stability of **14a** towards nucleophiles

Compound **14a** (1 mg) is solubilized in a 0.05M  $K_2CO_3/MeOH$  (1 mL) then evaporated and injected on to a SYMMETRY C18 (5 $\mu$ m, 250x4.6 mm) column eluted with ammonium acetate 0.05 M at a flow rate of 1 mL/min using a photodiode array detector and coupled to a an electrospray mass spectrometer (negative ion mode).

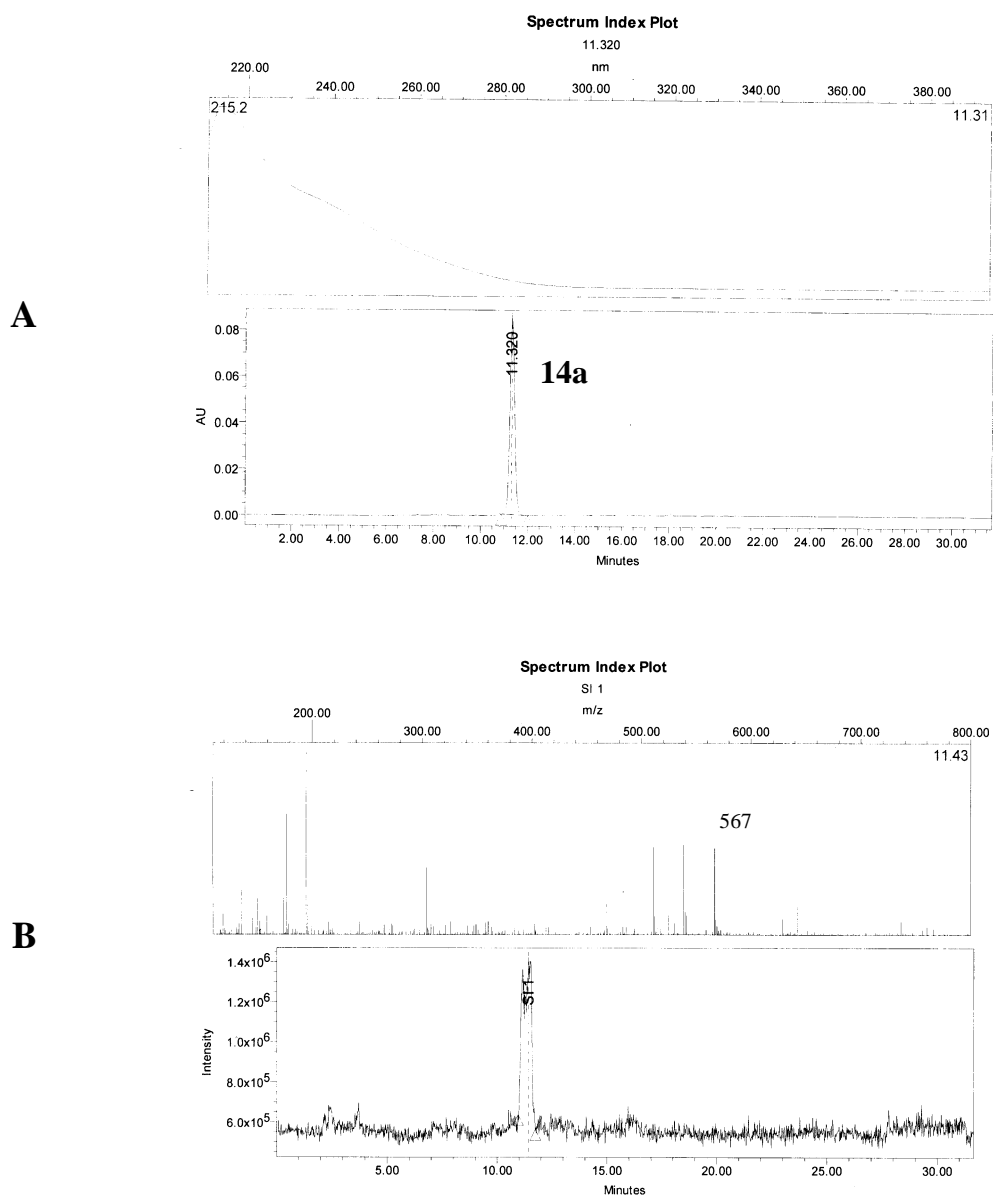

**Figure S22:** HPLC chromatogram (A) and HPLC/MS total ion current chromatogram (B) of **14a**.

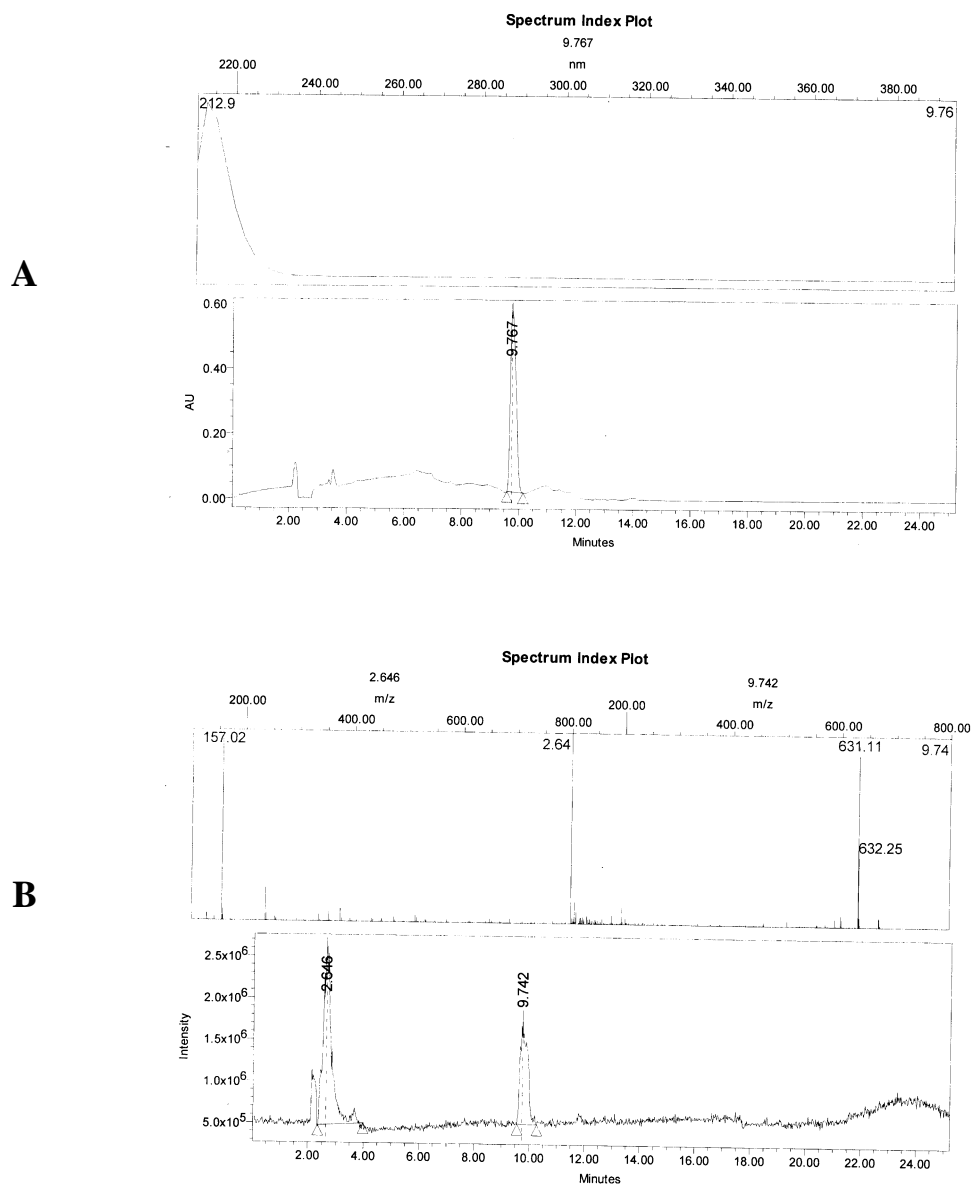

**Figure S23:** HPLC chromatogram (A) and HPLC/MS total ion current chromatogram (B) of the  $\text{K}_2\text{CO}_3/\text{MeOH}$  treatment of **14a**.
